# Supplementary material
Source: PubMed Central journal article supplement (PMC3881976)
Supplement: NIHMS537759-supplement-11-01447_SuppTab1_pdf.pdf [file NIHMS537759-supplement-11-01447_SuppTab1_pdf.pdf]

**Supplemental Table: Primers used for quantitative PCR**

|                   |                                  |
|-------------------|----------------------------------|
| L32 For           | 5'-AAGCGAAACTGGCGGAAAC-3'        |
| L32 Rev           | 5'-TAACCGATGTTGGGCATCAG-3'       |
| NFATc1 For        | 5'-GCCTCGTATCAGTGGGCGAAG-3'      |
| NFATc1 Rev        | 5'-CGAAGCTCGTATGGACCA-3'         |
| IkB $\alpha$ For  | 5'-CTGCAGGCCACCAACTACAA-3'       |
| IkB $\alpha$ Rev  | 5'-CAGCACCCAAAGTCACCAAGT-3'      |
| IFN $\gamma$ For  | 5'-GTCAACAACCCACAGGTCCAG-3'      |
| IFN $\gamma$ Rev  | 5'-CCTTTTCCGCTTCCTGAGG-3'        |
| IL-2 For          | 5'-CCTGAGCAGGATGGAGAATTACA-3'    |
| IL-2 Rev          | 5'-TCCAGAACATGCCGCAGAG-3'        |
| TNF $\alpha$ For  | 5'-AATGGCCTCCCTCTCATCAGT-3'      |
| TNF $\alpha$ Rev  | 5'-GCTACAGGCTTGTCACCTCGAATT-3'   |
| Cav1 $\alpha$ For | 5'-AACATCTACAAGCCCAACAACAAGG-3'  |
| Cav1 $\beta$ For  | 5'-AAGCAAGTGTATGACGCGCACACC-3'   |
| Cav1 Rev          | 5'-GGTTCTGCAATCACATCTTCAAAGTC-3' |
